# Supplementary material
Source: Springer Nature journal article supplement (https://www.springermedizin.de/resource/supplementary/13054_2013_1930_MOESM3_ESM.pdf/9711954)

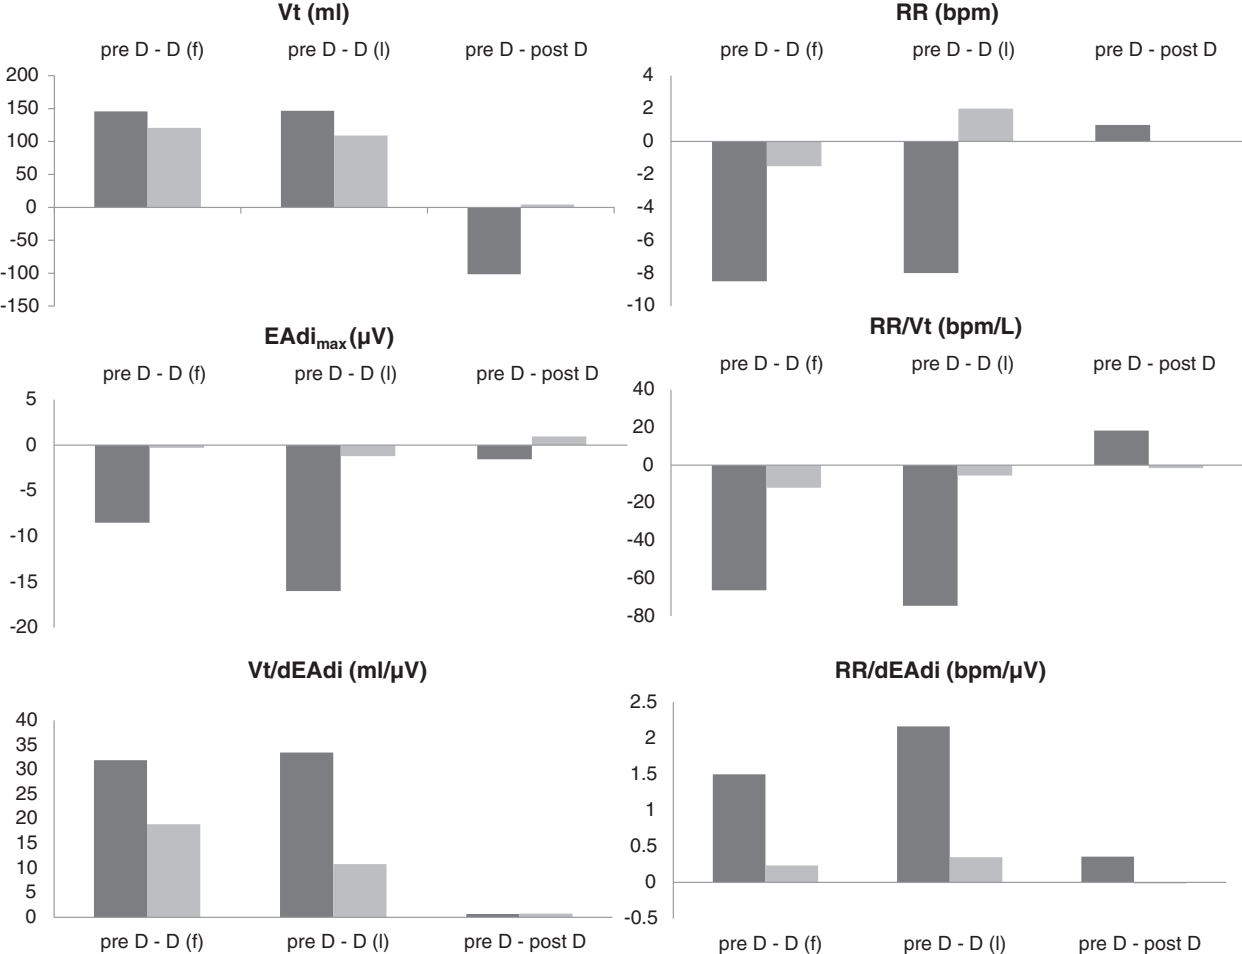

Supplement: MOESM3 [file 9711954]
